1 **Improved biorepository to support sickle cell disease genomics and clinical**  
2 **research: A practical approach to link patient data and biospecimens from**  
3 **Muhimbili Sickle Cell Program, Tanzania**

4 Upendo Masamu<sup>1\*</sup>, Raphael Z Sangeda<sup>1,2</sup>, Josephine Mgaya<sup>1</sup>, Siana Nkya<sup>3</sup>, Beatrice Octavian<sup>1</sup>,  
5 Frank R Mtiye<sup>1</sup>, Joyce Nduguru<sup>1</sup>, Agnes Jonathan<sup>1</sup>, Daniel Kandonga<sup>1</sup>, Irene K Minja<sup>1,4</sup>,  
6 Paschal Rugajo<sup>1,5</sup>, Emmanuel Balandya<sup>6</sup>, Julie Makani<sup>1,7</sup>

7 <sup>1</sup>Muhimbili Sickle Cell Program, Department of Hematology and Blood Transfusion,  
8 Muhimbili University of Health and Allied Sciences, Dar es Salaam, Tanzania.

9 <sup>2</sup>Department of Pharmaceutical Microbiology, Muhimbili University of Health and Allied  
10 Sciences, Dar es Salaam, Tanzania.

11 <sup>3</sup>Department Biochemistry, Muhimbili University of Health and Allied Sciences, Dar es  
12 Salaam, Tanzania.

13 <sup>4</sup>Department of Restorative Dentistry, Muhimbili University of Health and Allied Sciences,  
14 Dar es Salaam, Tanzania.

15 <sup>5</sup>Department of Internal Medicine, Muhimbili University of Health and Allied Sciences, Dar  
16 es Salaam, Tanzania.

17 <sup>6</sup>Department of Physiology, Muhimbili University of Health and Allied Sciences, Dar es  
18 Salaam, Tanzania.

19 <sup>7</sup>Department of Hematology and Blood Transfusion, Muhimbili University of Health and  
20 Allied Sciences, Dar es Salaam, Tanzania.

21

22 \* Corresponding author: [umasamu@blood.ac.tz](mailto:umasamu@blood.ac.tz)

**NOTE: This preprint reports new research that has not been certified by peer review and should not be used to guide clinical practice.**

## 23 **Abstract**

24 Genetic modifiers underlying various sickle cell disease phenotypic expressions are largely  
25 unexplored in Africa due to lack of databases linking biospecimens with demographic and  
26 clinical data. The problem may be compounded by a complete lack of biorepositories in these  
27 settings. This article aims to document the physical verification of biospecimens stored in the  
28 biorepository and link them to patient clinical and demographic information to facilitate plans  
29 for genomic and related clinical research studies. We reviewed and updated the existing  
30 biorepository infrastructure at Muhimbili Sickle Cell Programme in Dar es Salaam, Tanzania.  
31 The database of archived biospecimens was updated with the location information of respective  
32 biospecimens following the physical verification of biospecimens and then mapping the patient  
33 demographic and clinical data with the biospecimen data using sickle cell patients'  
34 demographic identifiers. Three freezers maintained at -80°C store a total of 74,079  
35 biospecimens, of which 63,345 were from 5,159 patients registered in the Muhimbili Sickle  
36 Cohort from 2004 to 2016. Out of stored biospecimens, follow-ups were 46,915 (74.06%),  
37 control 8,067 (12.74%), admission 5,517 (8.71%) and entry 2,846 (4.49%). Of these registered  
38 patients, females were 2,521 (48.87%) and males were 2,638 (51.13%). The age distribution  
39 was 1 to 59 years, with those above 18 years being 577 (11.18%) and children 4,582 (88.82%)  
40 of registered patients. The notable findings during the process include a lack of automated  
41 biospecimen checks, laboratory information management system and standardization of  
42 equipment used, biospecimens not linked to clinical and demographic data, date format  
43 inconsistencies, lack of regular updating of a database on exhausted biospecimens and updates  
44 when biospecimens are moved between positions within freezers. Well-organized  
45 biorepository plays a crucial role in answering future research questions. Enforcing strict  
46 standard operating procedures and quality control standards will ensure that laboratory  
47 scientists and other users adhere to the best biospecimen management procedures.

## 49 **Introduction**

50 Sickle cell disease (SCD) is an inherited disease caused by a single-gene mutation affecting the  
51  $\beta$ -globin gene on chromosome 11. It results in an abnormal hemoglobin protein (HbS) which  
52 affects the shape and function of red blood cells (RBC) and subsequently impacts nearly all  
53 body organ systems [1,2]. SCD is one of the most prevalent inherited blood disorders. An  
54 estimated 300,000 individuals are born each year with SCD, the highest burden being in Africa,  
55 where up to 75% of SCD births occur [3]. It is estimated that 50–80% of infants born with SCD  
56 in Africa die before the age of 5 years [4]. Research on SCD is crucial, allowing the discovery  
57 of a cure that will reduce its burden on afflicted families. Therefore, it is imperative that the  
58 current and future research on SCD store and maintain biospecimens appropriately linked to  
59 their clinical and demographic information.

60 Biorepositories hold a crucial role in achieving biomedical progress and improving research  
61 capacity in Africa [5–7], given the advancements in technology in medical sciences.  
62 Biospecimens should be stored in a manner to support not only current use but also future  
63 clinical or research studies. Human biorepositories are used to understand diseases and  
64 diagnoses and ultimately provide information on the cure and treatment [8,9]. Several  
65 initiatives have been established to support African biorepository activities. Such initiatives  
66 include the Human, Heredity, and Health in Africa (H3Africa), which has helped several  
67 biorepositories such as the Integrated Biorepository at Makerere University College of Health  
68 Sciences (IBRH3AU), Institute of Human Virology (IHV) H3Africa Biorepository in Abuja  
69 Nigeria Clinical Laboratory Services (a Division of the Wits Health Consortium) in  
70 Johannesburg South Africa. According to the literature, Gambia was the first country in Africa  
71 to establish a national DNA bank [10,11]. Sustainability and the ability to answer research  
72 questions are critical for a standard biorepository [12–15]. A well-maintained biorepository is  
73 expected to have stored biospecimens to ensure quick biospecimen retrieval and the validity of

74 the analytical tests. This includes a clear link between the biospecimen data and clinical and  
75 demographic information, increasing the scientific value of stored biospecimens [16,17]. This  
76 can be achieved if clearly defined procedures govern biorepository processes. Several  
77 discussions have been around regarding the standards that any biorepository is supposed to  
78 have. One of the discussions is on standard operating procedures (SOPs) for biorepository  
79 processes such as sample collection, storage, processing, and information management such as  
80 Laboratory information management system (LIMS) [16,18,19]. There are few established  
81 biorepositories for SCD globally. These establishments would speed the discovery of  
82 mitigations against SCD, including discovering novel biological markers for treatment.

83 The Muhimbili Sickle Cell Programme at the Muhimbili University of Health and Allied  
84 Sciences (MUHAS) in Tanzania was established in 2004 and aimed to offer clinical care and  
85 build research capacity in SCD [1,3]. The program recruited a Muhimbili Sickle Cell Cohort  
86 (MSC) database of over 5,000 SS individuals, including their demographic, clinical, and  
87 biospecimens data. The main goal of the program was to conduct research on SCD that will  
88 identify the disease spectrum, causes of disease morbidity and mortality, and describe genetic  
89 determinants of the disease [20–25]. Following the research impact achieved with the MSC[3],  
90 MUHAS was awarded twice a grant named Sickle Pan African Consortium (SPARCo) by the  
91 National Institutes of Health (NIH). This was a collaborative grant between MUHAS in  
92 Tanzania as a research hub and a site, Cape Town University as a data coordinating center and  
93 two other research sites in Nigeria and Ghana in phase 1 between 2017 and 2021. In phase 2,  
94 granted between 2021 and 2026, additional three sites in four countries (Mali, Uganda and a  
95 shared site in Zimbabwe and Zambia) were established. SPARCo plans to conduct genomic  
96 and clinical studies in the second phase of the SPARCo grant award [26].

97 The challenge in Muhimbili Sickle Program and other centers in African counties is the ability  
98 to manage and trace biospecimens that move between different positions and locations in the

99 biorepository. In addition, linking the biospecimen data to the clinical and demographic data is  
100 tedious without an automated way of handling and storing biospecimens. Linking the  
101 biospecimens with their clinical and demographic data is essential because it may give insight  
102 into the pattern that may accelerate SCD research progress and discovery. Furthermore,  
103 automatic handling and storing of biospecimens is necessary to allow biospecimen integrity  
104 and reproducibility of results [19,27]. To achieve this goal, this study was designed to facilitate  
105 genomics research by preparing easily maintainable records of biospecimens from the previous  
106 MSC cohort and new biospecimens from patients. We describe the experience of conducting  
107 quality control and verifying all archived biospecimens from Muhimbili Sickle Program and  
108 Sickle Pan African Research Consortium (SPARCo) and integrate the biospecimen database  
109 with the clinical and demographic data using the Research Electronic Data Capture (REDCap).  
110 The system established will allow quick and intuitive data management that is scalable. The  
111 documentation of quality assured biorepository shall serve as the basis for other SSA countries  
112 to emulate in practice and pave the way for collaborative genomic studies utilizing the existing  
113 biospecimens.

114

## 115 **MATERIALS AND METHODS**

### 116 **Study design and population**

117 The study was conducted among patients who consented to participate in the MSC study and  
118 its nested studies, such as the Vascular Function Intervention Trial (VFIT) and Strategic Award  
119 Study [3,28]. The enrollment into the MSC included all individuals who attended a clinic or  
120 patients suspected clinically diagnosed to have SCD at Muhimbili National Hospital (MNH)  
121 in Dar es Salaam, Tanzania. Patients were registered mainly from the coastal regions and other  
122 regions in Tanzania.

## 123 **Ethics Statement**

124 The Senate Research and Publications Committee of the Muhimbili University of Health and  
125 Allied Sciences (MUHAS) in Tanzania approved the study (Ref. No.DA.282/298/01.C/).  
126 Written informed consent was obtained from all participants. For individuals 18 years or above,  
127 while for minors, a parent/ guardian consented and signed the consent on behalf of the patient;  
128 adolescents provided assent.

## 129 **Biospecimens verification**

130 The study reviewed, quality assured and updated the existing biorepository infrastructure at the  
131 program to link SCD biospecimen data with their clinical and demographic data. During the  
132 MSC, patients were identified at entry, admission, follow-up, and as a control which were  
133 recorded as visit types. Different biospecimens were collected, including plasma, buffy coat,  
134 serum, DNA and isolates. These biospecimens were stored in microtubes within a cryobox,  
135 whereby one cryobox would only store one biospecimen type for a specific study. The  
136 cryoboxes were labeled on top with the study name, biospecimen type and box number. The  
137 numbers on the cryobox were unique for each biospecimen type throughout the study. Basic  
138 clinical and demographic information was collected using case report forms (CRF).

139 Physical verification of biospecimen location within a freezer was done by verifying  
140 information such as freezer number, a compartment within a freezer, rack and box number.  
141 Information regarding the biospecimen, such as type and study, were also verified during the  
142 process. Data from physical verification were compared to the one on the database and updated  
143 corresponding records. The final database was cleaned up by maintaining all records of  
144 biospecimens found in the freezers during physical verification and having all the verified  
145 information about the biospecimens and freezer locations.

146

147 Tubes found empty and still in the freezers were removed and updated in the database. The  
148 clean biospecimen data was mapped and linked to its clinical and demographic information  
149 using demographic identifiers through which two categories were identified cohort-related for  
150 whom demographic identifiers were available and non-cohort for biospecimens from patients  
151 not admitted in the MSC cohort. The clean final biospecimen data were migrated to the  
152 REDCap database to allow easy record-keeping and retrieval. A REDCap (Research Electronic  
153 Data Capture) database was created to store curated biospecimens and patient data from this  
154 study. REDCap is a secure, web-based application designed to support data capture for research  
155 studies, providing (1) an intuitive interface for validated data entry; (2) audit trails for tracking  
156 data manipulation and export procedures; (3) automated export procedures for seamless data  
157 downloads to standard statistical packages; and (4) procedures for importing data from external  
158 sources [29,30]. The REDCap system and tools were hosted at Muhimbili University of Health  
159 and Allied Science.

160

## 161 **Data analysis plan**

162 Descriptive such as counts, averages and proportions were used to summarize patients'  
163 demographic and biospecimen data. Rstudio 2022.07.2 was used for summarizing the data.

## 164 **Results**

165 The Hematology Clinical and Research Laboratory (HCRL) at Muhimbili has three freezers  
166 (Fig1A) used to store the biospecimens from MSC. The freezer has three areas within a  
167 compartment, columns, and rows (Fig1B). Biospecimens of types of plasma, buffy coat,  
168 deoxyribonucleic acid (DNA), serum, urine, washed red blood cells and bacterial isolates were  
169 aliquoted in the 0.5-2uL microtubes and arranged in 9x9 cryoboxes. The freezers were  
170 monitored for temperature checks twice daily and adequately documented. A backup generator

171 is connected to the main power of the laboratory to observe the quality of the archived  
172 biospecimens in case of a power failure. Currently, the HCRL contains a total of 74,079  
173 biospecimens. The space occupied by these biospecimens was 70% of the available space for  
174 archived biospecimens stored in the three -80°C freezers.

175

176 Out of 74,079 archived biospecimens, 63,345 biospecimens were from 5,159 patients  
177 registered under MSC. The remaining 10,734 biospecimens were from nested studies within  
178 the MSC. More patients were seen at the inception of the project in 2004, but in 2016 new  
179 clinics were opened at other referral hospitals that patients were referred to instead of coming  
180 to Muhimbili (Fig 2). Of 5,159 registered patients, the females were 2,521 (48.87%), while the  
181 males were 2,638 (51.13%). In terms of age distribution, the minimum age was less than one  
182 year while the maximum age was 59, with those above 18 years being 577 (11.18%), while  
183 children were 4,582 (88.82%) of registered patients under MSC "Table 1". The total number  
184 of biospecimens collected per patient is categorized in Fig 3. The group labeled 1 is the group  
185 with patients with only one biospecimen collected and others are in intervals of 10  
186 biospecimens.

187

188 **Table 1:** Demographic characteristics of patients under the Muhimbili Sickle Cohort

| <b>Attribute</b>            | <b>N (%)</b>   | <b>Test statistics (p-value)</b> |
|-----------------------------|----------------|----------------------------------|
| <b>Gender</b>               |                |                                  |
| Female                      | 2,521 (48.87%) | $\chi^2= 2.65(0.1033)$           |
| Male                        | 2,638 (51.13%) |                                  |
| <b>Age (years)</b>          |                |                                  |
| Minimum                     | < 1 year       |                                  |
| Maximum                     | 59             |                                  |
| Average                     | 8.29           |                                  |
| <b>Age category (N (%))</b> |                |                                  |
| Adults                      | 577 (11.18%)   | $\chi^2= 3109.10 (< 0.001)$      |
| Children                    | 4,582 (88.82%) |                                  |



189

190 Out of 63,345 biospecimens that were collected per each visit type follow-ups were 46,915  
 191 (74.06%), control 8,067 (12.74%), admission 5,517 (8.71%) and entry 2,846 (4.49%) "Table  
 192 2". From the physical verification, biospecimen types present include plasma 38,008 (60.00%),  
 193 buffy coat 15,323 (24.19%), serum 4,671 (7.37%), DNA 4,528 (7.15%) and bacterial isolates  
 194 258 (0.41%) "Table 3". The 557 biospecimens "Table 3" were from a nested study on Amino  
 195 Acids in Tanzanian Children with Sickle Cell Disease under Vascular Function Intervention  
 196 Trial (V-FIT)[31]. One of the outcomes of the verification process was to generate and update  
 197 freezer plan maps, usually placed in front of the freezer showing the position of boxes with  
 198 biospecimens within the freezers. The map captures the biospecimen type, box number,  
 199 compartment, rack position within a freezer and the visit type (Fig 1C).

200 **Table 2:** Number of archived biospecimens per year and visit type under Muhimbili Sickle  
 201 Cohort

| Year                    | Admission                | Control                   | Entry                    | Follow-up                  | Year total     |
|-------------------------|--------------------------|---------------------------|--------------------------|----------------------------|----------------|
| 2004                    | 34                       | 10                        | 965                      | 1,144                      | 2,153 (3.40%)  |
| 2005                    | 442                      | 154                       | 255                      | 4,261                      | 5,112 (8.07%)  |
| 2006                    | 224                      | 275                       | 381                      | 4,785                      | 5,665 (8.94%)  |
| 2007                    | 359                      | 859                       | 336                      | 7,575                      | 9,129 (14.41%) |
| 2008                    | 619                      | 1,221                     | 266                      | 6,270                      | 8,376 (13.22%) |
| 2009                    | 564                      | 423                       | 80                       | 4,409                      | 5,476 (8.64%)  |
| 2010                    | 529                      | 462                       | 63                       | 3,847                      | 4,901 (7.74%)  |
| 2011                    | 857                      | 1,025                     | 106                      | 5,258                      | 7,246 (11.44%) |
| 2012                    | 607                      | 696                       | 139                      | 3,162                      | 4,604 (7.27%)  |
| 2013                    | 568                      | 1,032                     | 154                      | 3,255                      | 5,009 (7.91%)  |
| 2014                    | 391                      | 1,232                     | 78                       | 2,393                      | 4,094 (6.46%)  |
| 2015                    | 323                      | 637                       | 23                       | 524                        | 1,507 (2.38%)  |
| 2016                    |                          | 41                        |                          | 32                         | 73 (0.12%)     |
| <b>Visit type total</b> | <b>5,517<br/>(8.71%)</b> | <b>8,067<br/>(12.74%)</b> | <b>2,846<br/>(4.49%)</b> | <b>46,915<br/>(74.06%)</b> | <b>63,345</b>  |

202

203 **Table 3:** Number of each archived biospecimen type under the Muhimbili Sickle Cohort

| Year | Buffy coat | DNA | Isolates | Plasma | Serum | V-FIT |
|------|------------|-----|----------|--------|-------|-------|
| 2004 | 589        | 20  |          | 1,153  | 391   |       |
| 2005 | 2,407      | 93  |          | 2,420  | 192   |       |

|                               |                            |                          |                        |                            |                          |                        |
|-------------------------------|----------------------------|--------------------------|------------------------|----------------------------|--------------------------|------------------------|
| 2006                          | 2,121                      | 240                      | 69                     | 2,933                      | 302                      |                        |
| 2007                          | 1,449                      | 1,829                    | 37                     | 4,699                      | 1,115                    |                        |
| 2008                          | 738                        | 673                      | 95                     | 6,292                      | 578                      |                        |
| 2009                          | 603                        | 205                      | 54                     | 3,857                      | 757                      |                        |
| 2010                          | 254                        | 296                      | 3                      | 4,139                      | 209                      |                        |
| 2011                          | 1,339                      | 1,172                    |                        | 4,365                      | 370                      |                        |
| 2012                          | 1,624                      |                          |                        | 2,559                      | 253                      | 168                    |
| 2013                          | 1,993                      |                          |                        | 2,487                      | 223                      | 306                    |
| 2014                          | 1,604                      |                          |                        | 2,267                      | 140                      | 83                     |
| 2015                          | 550                        |                          |                        | 816                        | 141                      |                        |
| 2016                          | 52                         |                          |                        | 21                         |                          |                        |
| <b>Biospecimen type total</b> | <b>15,323<br/>(24.19%)</b> | <b>4,528<br/>(7.15%)</b> | <b>258<br/>(0.41%)</b> | <b>38,008<br/>(60.00%)</b> | <b>4,671<br/>(7.37%)</b> | <b>557<br/>(0.88%)</b> |

## 204 Discussion

205 This paper documents best practices and challenges from verifying archived biospecimens and  
 206 experience at the Muhimbili Sickle Cell Program in Dar es Salaam, Tanzania. Physical  
 207 verification of archived biospecimens was carried out whereby a total of 74,079 biospecimens  
 208 were archived, of which 63,345 biospecimens were from 5,159 patients registered under MSC.  
 209 Different biospecimens, such as buffy coat, plasma, DNA, serum and bacterial isolates, were  
 210 archived.

211 During the physical verification process, some observations needed to be addressed to have a  
 212 sustainable biorepository to answer future research questions. The absence of an automated  
 213 way of handling biospecimens made the verification process tedious and manual. The lack of  
 214 automatic biospecimen checks added to the long, tedious biospecimen verification process.  
 215 Institutions planning to have biorepositories should consider having an automated way of  
 216 handling biospecimens, such as a Laboratory Management Information System (LIMS), to  
 217 allow automatic biospecimen checks that will enable fast and efficient tracking of archived  
 218 biospecimens. The use of an automated way of handling and storing biospecimens was also  
 219 recommended by other researchers to preserve biospecimen integrity and allow the  
 220 reproducibility of results [19,27,32,33].

221 Some of the tubes with archived biospecimens were missing date labels that indicate when the  
222 biospecimens were taken. The recording of the date on the tube needs to be enforced because  
223 biospecimens are only kept for a specific period and those with no dates may need to be  
224 discarded. Proper date annotation is critical to allow biospecimens' data integrity and quality  
225 [17,19]. In addition, some of the archived biospecimens were exhausted in the freezer, but their  
226 information was not updated in the database. This calls for laboratory scientists to regularly  
227 update the database with information on the exhausted biospecimens. This will allow other  
228 users to be informed of the finished biospecimens. The process can be enforced and make  
229 laboratory scientists more accountable by implementing a LIMS that tracks users' activities by  
230 their identifiers [32].

231 Lack of standards on the type of tube to be used, whereby some tubes had volume labels while  
232 some did not. The absence of a volume label caused difficulties verifying the volume for the  
233 archived biospecimens. This calls for developing an SOP on the standard of the types of  
234 equipment to be used for biospecimen archiving, which will guide the procurement of  
235 respective equipment. Other researchers also recommended the need to have SOPs for the  
236 procurement of biospecimen archiving equipment [8].

237 Different recorded date formats from multiple users who entered data in Microsoft Excel. The  
238 date format challenge can also occur when a proper database system is in place. However, the  
239 database management engine usually handles date format issues more conveniently. Internet  
240 connectivity is another challenge in Africa, preventing real-time access to LIMS. In such cases,  
241 laboratory scientists may use MS Excel to temporarily log data and then later import it to an  
242 internet database via LIMS. Hence to overcome these challenges, there is a need to have an  
243 SOP in place that map the process of recording information for the biospecimen [8]. Such SOP  
244 includes a clause defining a date format to be used and adhered to.

245 It was also observed that some biospecimens were moved to new positions within a freezer,  
246 but that information was not updated in the biospecimens' database. This calls for logging to  
247 track biospecimens' movement within the freezer to account for biospecimen misplacement.  
248 Furthermore, a few tubes were empty and still found in the freezer. Strict rules and SOP should  
249 be implemented to guide laboratory scientists on biospecimen management. Such rules include  
250 removing empty tubes once exhausted and updating the database. In addition, there should be  
251 ownership of the biospecimen management systems among the users. This means a person who  
252 oversees and enforces all the rules should be answerable to all queries [34]. Staff training and  
253 periodic review of processes are essential to ensure that SOPs are being adhered to [33,34].

## 254 **Conclusion**

255 The biorepository plays a crucial role in answering future research questions to allow the  
256 discovery of novel genomic markers for diagnosing and treating SCD. However, this will be  
257 achieved if biospecimens are adequately managed. Strict controlled standard operating  
258 procedures and quality assured and quality controlled standards must be enforced to ensure that  
259 laboratory scientists and other users adhere to the best biospecimen management procedures.  
260 This includes SOP for the procurement of standard equipment, biospecimen storage (such as  
261 biospecimen labeling during archiving), and movement from and to the freezers. Regular  
262 training on best practices and SOPs for new staff and refresher training for existing ones.  
263 Furthermore, one should have LIMS and automatic checks that will allow fast and efficient  
264 tracking of archived biospecimens.

265

## 266 **Acknowledgments**

267 We would like to thank SCD patients whose data were used in this study and all staff at the  
268 Muhimbili Sickle Cell Program for their support.

269 **Author Contributions**

270 **Conceptualization:** Raphael Z Sangeda

271 **Investigation:** Upendo Masamu, Josephine Mgaya, Beatrice Octavian and Frank R Mtiye

272 **Formal analysis and Visualization:** Upendo Masamu and Raphael Z Sangeda

273 **Writing – Original Draft Preparation:** Upendo Masamu, Raphael Z Sangeda, Josephine  
274 Mgaya, Siana Nkya, Beatrice Octavian, Frank R Mtiye, Joyce Nduguru, Agnes Jonathan,  
275 Daniel Kandonga, Irene K Minja, Paschal Rugajo, Emmanuel Balandya and Julie Makani

276 **Writing – Review & Editing:** Upendo Masamu, Raphael Z Sangeda, Josephine Mgaya, Siana  
277 Nkya, Beatrice Octavian, Frank R Mtiye, Joyce Nduguru, Agnes Jonathan, Daniel Kandonga,  
278 Irene K Minja, Paschal Rugajo, Emmanuel Balandya and Julie Makani.

279

280 **References**

281 1. Tluway F, Makani J. Sickle cell disease in Africa: an overview of the integrated  
282 approach to health, research, education and advocacy in Tanzania, 2004-2016. Br J  
283 Haematol. 2017 Jun;177(6):919–29.

284 2. Masamu U, Sangeda RZ, Kandonga D, Ondengo J, Ndobho F, Mmbando B, et al.  
285 Patterns and patient factors associated with loss to follow-up in the Muhimbili sickle  
286 cell cohort, Tanzania. BMC Health Serv Res. 2020 Dec 14;20(1):1141.

287 3. Makani J, Tluway F, Makubi A, Soka D, Nkya S, Sangeda R, et al. A ten year review of  
288 the sickle cell program in Muhimbili National Hospital, Tanzania. BMC Hematol.  
289 2018;18(1):1–13.

290 4. Aygun B, Odame I. A global perspective on sickle cell disease. Pediatr Blood Cancer.  
291 2012 Aug;59(2):386–90.

292 5. Staunton C, Moodley K. Challenges in biobank governance in Sub-Saharan Africa.  
293 BMC Med Ethics. 2013 Dec 11;14(1):35.

- 294 6. Edwards T, Cadigan RJ, Evans JP, Henderson GE. Biobanks containing clinical  
295 specimens: Defining characteristics, policies, and practices. *Clin Biochem*. 2014  
296 Mar;47(4–5):245–51.
- 297 7. Hewitt RE. Biobanking: the foundation of personalized medicine. *Curr Opin Oncol*.  
298 2011 Jan;23(1):112–9.
- 299 8. Harati MD, Williams RR, Movassaghi M, Hojat A, Lucey GM, Yong WH. An  
300 Introduction to Starting a Biobank. In: *Methods in Molecular Biology* [Internet]. 2019.  
301 p. 7–16. Available from: [http://link.springer.com/10.1007/978-1-4939-8935-5\\_2](http://link.springer.com/10.1007/978-1-4939-8935-5_2)
- 302 9. Siwek M. An Overview of Biorepositories—Past, Present, and Future. *Mil Med*. 2015  
303 Oct;180(10S):57–66.
- 304 10. Sirugo G, Loeff MS Van Der, Sam O, Nyan O, Pinder M, Hill A V, et al. A national  
305 DNA bank in The Gambia, West Africa, and genomic research in developing countries.  
306 *Nat Genet*. 2004 Aug;36(8):785–6.
- 307 11. Staunton C, Moodley K. Challenges in biobank governance in Sub-Saharan Africa.  
308 *BMC Med Ethics*. 2013 Dec 11;14(1):35.
- 309 12. Kelly SM, Wiehagen LT, Schumacher PE, Dhir R. Methods to Improve Sustainability  
310 of a Large Academic Biorepository. *Biopreserv Biobank*. 2017;15(1):31–6.
- 311 13. Doucet M, Yuille M, Georghiou L, Dagher G. Biobank sustainability: current status and  
312 future prospects. *Journal of Biorepository Science for Applied Medicine*. 2017;Volume  
313 5:1–7.
- 314 14. Adedokun BO, Olopade CO, Olopade OI. Building local capacity for genomics research  
315 in Africa: Recommendations from analysis of publications in Sub-Saharan Africa from  
316 2004 to 2013. *Glob Health Action*. 2016;9(1):1–9.
- 317 15. De Souza YG, Greenspan JS. Biobanking past, present and future. *AIDS*. 2013  
318 Jan;27(3):303–12.

- 319 16. Harati MD, Williams RR, Movassaghi M, Hojat A, Lucey GM, Yong WH. An  
320 Introduction to Starting a Biobank. In: *Methods in Molecular Biology*. 2019. p. 7–16.
- 321 17. Greenberg B, Christian J, Meltzer Henry L, Leavy M ichelle, Moore H. Biorepositories:  
322 Addendum to Registries for Evaluating Patient Outcomes: A User’s Guide.,  
323 <https://www.ncbi.nlm.nih.gov/books/NBK493632/#!po=12.5000>; 2018.
- 324 18. Vaught JB, Henderson MK. Biological sample collection, processing, storage and  
325 information management. *IARC Sci Publ*. 2011;(163):23–42.
- 326 19. Oluwole OG, Oosterwyk C, Anderson D, Adadey SM, Mnika K, Manyisa N, et al. The  
327 Implementation of Laboratory Information Management System in Multi-Site Genetics  
328 Study in Africa: The Challenges and Up-Scaling Opportunities. *Journal of Molecular*  
329 *Pathology* [Internet]. 2022;3(4):262–72. Available from: [https://www.mdpi.com/2673-](https://www.mdpi.com/2673-5261/3/4/22)  
330 [5261/3/4/22](https://www.mdpi.com/2673-5261/3/4/22)
- 331 20. Makani J, Cox SE, Soka D, Komba AN, Oruo J, Mwamtemi H, et al. Mortality in Sickle  
332 Cell Anemia in Africa: A Prospective Cohort Study in Tanzania. Schrijver I, editor.  
333 *PLoS One*. 2011 Feb 16;6(2):e14699.
- 334 21. Makani J, Komba AN, Cox SE, Oruo J, Mwamtemi K, Kitundu J, et al. Malaria in  
335 patients with sickle cell anemia: burden, risk factors, and outcome at the outpatient clinic  
336 and during hospitalization. *Blood*. 2010 Jan 14;115(2):215–20.
- 337 22. Mmbando BP, Mgaya J, Cox SE, Mtatiro SN, Soka D, Rwezaula S, et al. Negative  
338 epistasis between Sickle and foetal haemoglobin suggests a reduction in protection  
339 against malaria. *PLoS One*. 2015;10(5).
- 340 23. Makani J, Mgaya J, Balandya E, Msami K, Soka D, Cox SE, et al. Bacteraemia in sickle  
341 cell anaemia is associated with low haemoglobin: A report of 890 admissions to a  
342 tertiary hospital in Tanzania. *Br J Haematol*. 2015;171(2):273–6.

- 343 24. Cox SE, Makani J, Fulford AJ, Komba AN, Soka D, Williams TN, et al. Nutritional  
344 status, hospitalization and mortality among patients with sickle cell anemia in Tanzania.  
345 *Haematologica*. 2011 Jul;96(7):948–53.
- 346 25. Makani J, Menzel S, Nkya S, Cox SE, Drasar E, Soka D, et al. Genetics of fetal  
347 hemoglobin in Tanzanian and British patients with sickle cell anemia. *Blood*. 2011 Jan  
348 27;117(4):1390–2.
- 349 26. Makani J, Sangeda RZ, Nnodu O, Nembaware V, Osei-Akoto A, Paintsil V, et al.  
350 *SickleInAfrica*. *Lancet Haematol* [Internet]. 2020 Feb;7(2):e98–9. Available from:  
351 <https://linkinghub.elsevier.com/retrieve/pii/S2352302620300065>
- 352 27. Linsen L, Van Landuyt K, Ectors N. Automated Sample Storage in Biobanking to  
353 Enhance Translational Research: The Bumpy Road to Implementation. *Front Med*  
354 (Lausanne). 2020 Jan 9;6.
- 355 28. Cox SE, Makani J, Ellins E, Walter G, Mtunguja S, Kirkham FJ, et al. Endothelial  
356 Function In Tanzanian Children With Sickle Cell Disease: Baseline Results From The  
357 Vascular Function Intervention Trial (VFIT). *Blood*. 2013 Nov;122(21):984–984.
- 358 29. Harris PA, Taylor R, Minor BL, Elliott V, Fernandez M, O’Neal L, et al. The REDCap  
359 consortium: Building an international community of software platform partners. *J*  
360 *Biomed Inform* [Internet]. 2019 Jul;95:103208. Available from:  
361 <https://linkinghub.elsevier.com/retrieve/pii/S1532046419301261>
- 362 30. Harris PA, Taylor R, Thielke R, Payne J, Gonzalez N, Conde JG. Research electronic  
363 data capture (REDCap)—A metadata-driven methodology and workflow process for  
364 providing translational research informatics support. *J Biomed Inform* [Internet]. 2009  
365 Apr;42(2):377–81. Available from:  
366 <https://linkinghub.elsevier.com/retrieve/pii/S1532046408001226>



- 367 31. Cox SE, Makani J, Ellins E, Walter G, Mtunguja S, Kirkham FJ, et al. Endothelial  
368 Function In Tanzanian Children With Sickle Cell Disease: Baseline Results From The  
369 Vascular Function Intervention Trial (VFIT). *Blood*. 2013 Nov;122(21):984–984.
- 370 32. Labarga A, Beloqui I, Martin AG. Information Management. In 2017. p. 29–39.  
371 Available from: [https://link.springer.com/10.1007/978-1-4939-6921-0\\_4](https://link.springer.com/10.1007/978-1-4939-6921-0_4)
- 372 33. Cicek MS, Olson JE. Mini-Review of Laboratory Operations in Biobanking: Building  
373 Biobanking Resources for Translational Research. *Front Public Health* [Internet]. 2020  
374 Jul 28;8. Available from:  
375 <https://www.frontiersin.org/article/10.3389/fpubh.2020.00362/full>
- 376 34. Vaught J, Lockhart NC. The evolution of biobanking best practices. *Clinica Chimica*  
377 *Acta* [Internet]. 2012 Oct;413(19–20):1569–75. Available from:  
378 <https://linkinghub.elsevier.com/retrieve/pii/S0009898112002215>

379

380

### 381 **Figure captions**

382 **Fig 1:** Freezers with the archived biospecimens. (A) -80C freezers for storing archived  
383 biospecimen. (B) A picture showing the inside of one of the freezers. (C) Freezer plan map  
384 showing cryobox positions within the freezer (Compartment, C-Column and R-Rack,  
385 Biospecimen type: P-Plasma, FU-Follow-up, E-Entry, S-Serum)

386

387 **Fig 2:** Patients enrollment trend and biospecimen collection (A) Number of unique visiting  
388 patients and biospecimens collected over the years 2004-2016 in Muhimbili Sickle Cohort  
389 (MSC); (B) indicates the number of new patients enrolled each year.

390

391 **Fig 3:** Number of patients with a given number of biospecimens stored in the biorepository.  
392 . The group labeled 1 is the group with patients with only one biospecimen collected and others  
393 are in intervals of 10 biospecimens.

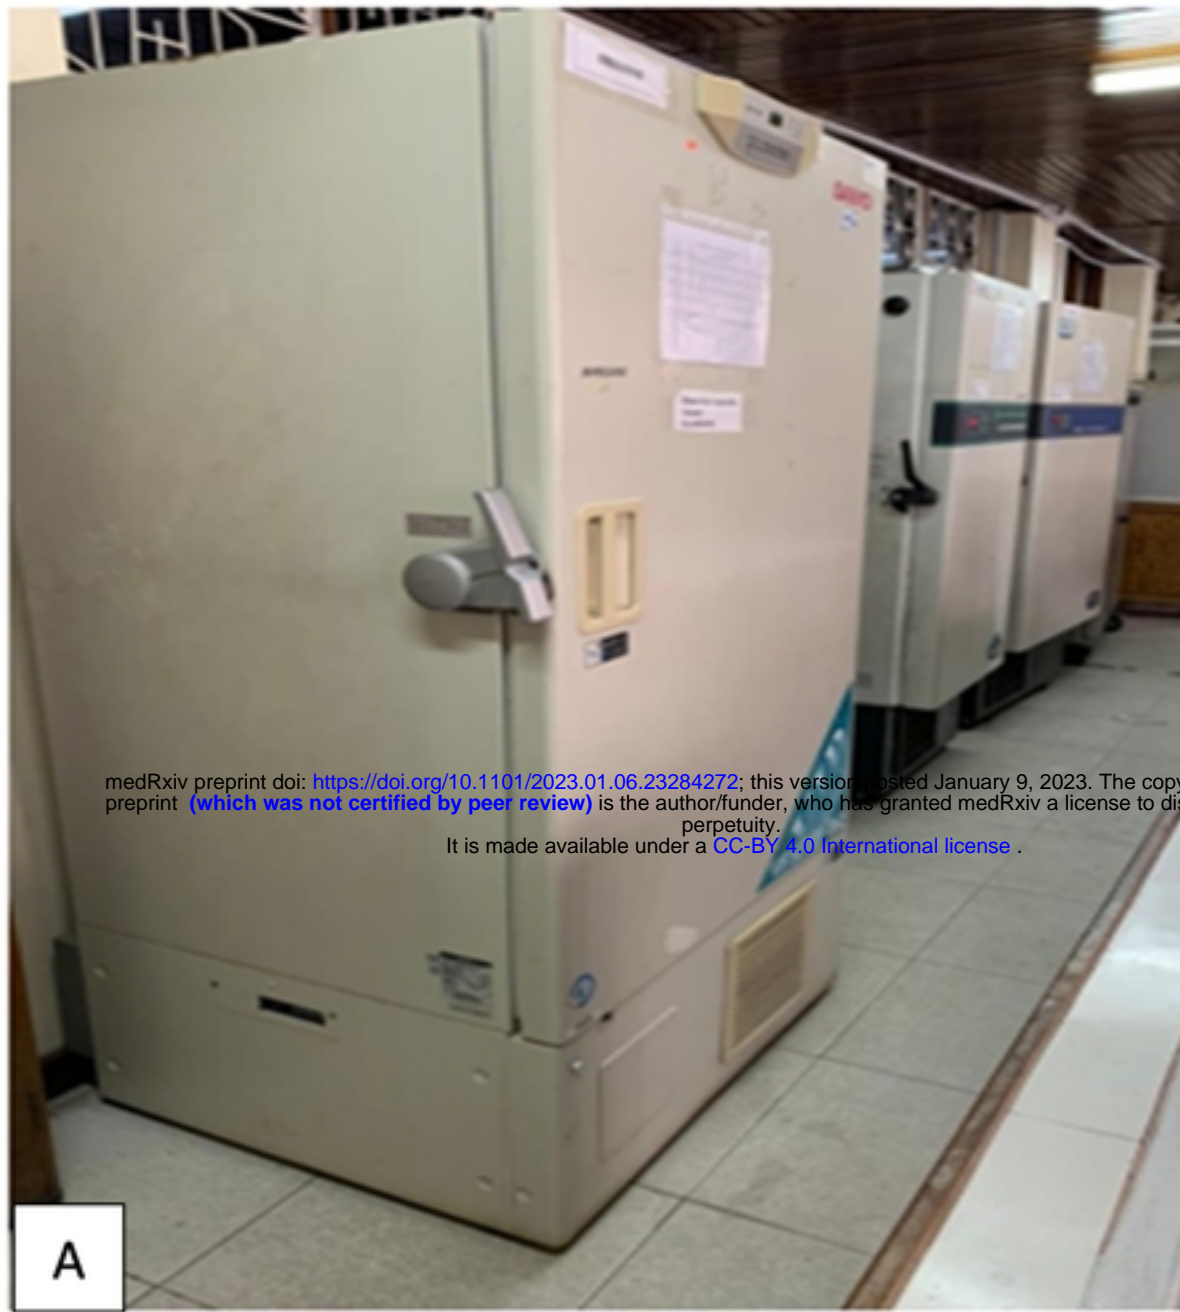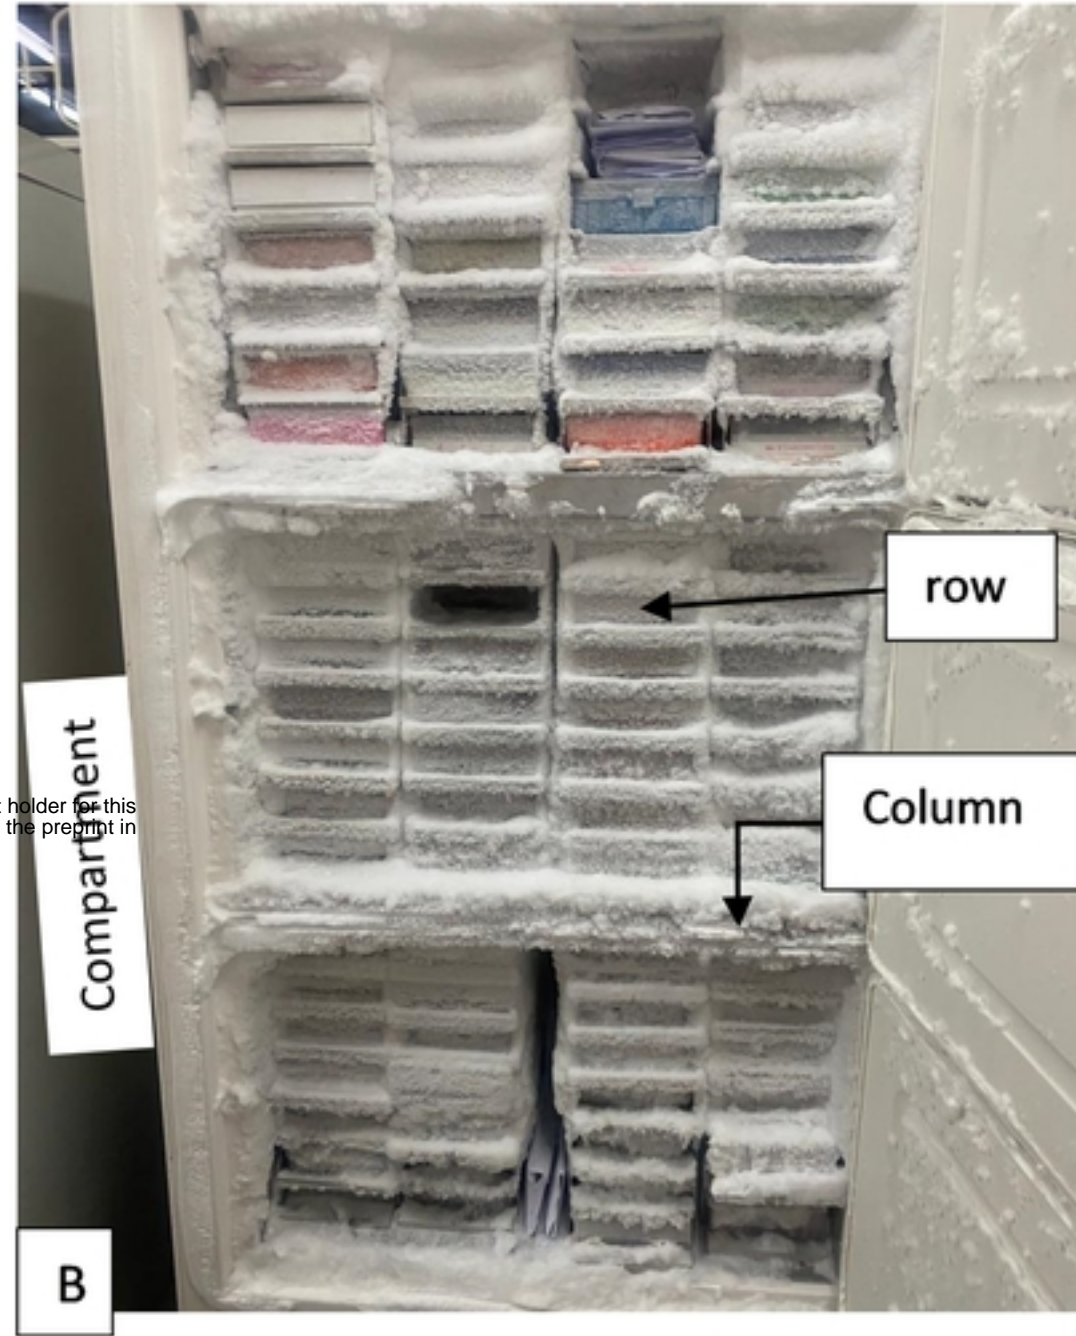

medRxiv preprint doi: <https://doi.org/10.1101/2023.01.06.23284272>; this version posted January 9, 2023. The copyright holder for this preprint (which was not certified by peer review) is the author/funder, who has granted medRxiv a license to display the preprint in perpetuity. It is made available under a [CC-BY 4.0 International license](https://creativecommons.org/licenses/by/4.0/).

| FREEZER 1   |      |           |               |           |         |           |               |           |         |           |        |           |        |
|-------------|------|-----------|---------------|-----------|---------|-----------|---------------|-----------|---------|-----------|--------|-----------|--------|
| COMPARTMENT | RACK | C1        |               | C2        |         | C3        |               | C4        |         | C5        |        | C6        |        |
|             |      | box label | sample visits | box label | sample  | box label | sample visits | box label | sample  | box label | sample | box label | sample |
| Upper       | R1   | P-B-77    | CONTROL       | P-C-1     | all     | P-C-25    | all           | P-4       | CONTROL | P-9       | FU     | P-33      | FU     |
|             |      | P-B-78    | CONTROL       | P-C-2     | all     | P-C-26    | all           | P-5       | CONTROL | P-10      | FU     | P-34      | FU     |
|             |      | P-B-79    | CONTROL       | P-C-3     | all     | P-C-27    | all           | P-6       | CONTROL | P-11      | FU     | P-35      | FU     |
|             |      | P-B-80    | CONTROL       | P-C-4     | all     | P-C-28    | all           | P/P-A-7   | CONTROL | P-12      | FU     | P-36      | FU     |
|             | R2   | P-B-81    | CONTROL       | P-C-5     | all     | P-C-29    | all           | P-8       | CONTROL | P-13      | FU     | P-37      | FU     |
|             |      | P-B-82    | CONTROL       | P-C-6     | all     | P-C-30    | all           | P-A-9     | CONTROL | P-14      | FU     | P-38      | FU     |
|             |      | B-85      | CONTROL       | P-C-8     | all     | P-C-31    | all           | P-A-10    | CONTROL | P-15      | FU     | P-39      | FU     |
|             | R3   | B-86      | CONTROL       | HCV-9     |         | P-C-32    | all           | P-A-11    | CONTROL | P-16      | FU     | P-40      | FU     |
|             |      | B-81      | CONTROL       | P-C-9     | all     | P-C-33    | all           | P-A-12    | CONTROL | P-17      | FU     | P-41      | FU     |
|             |      | B-87      | CONTROL       | P-C-10    | all     | P-C-34    | all           | P-A-13    | CONTROL | P-18      | FU     | P-42      | FU     |
|             |      | B-88      | CONTROL       | P-C-11    | all     | P-C-35    | all           | P-A-14    | CONTROL | P-19      | FU     | P-43      | FU     |
|             | R4   | B-89      | CONTROL       | P-C-12    | all     | P-1       | ADMISSION     | P-A-15    | CONTROL | P-20      | FU     | P-44      | FU     |
|             |      | P-B-40    | ADMISSION     | P-C-13    | all     | P-2       | ADMISSION     | P-A-16    | CONTROL | P-21      | FU     | P-45      | FU     |
|             |      | P-B-41    | ADMISSION     | P-C-14    | all     | P-3       | ADMISSION     | P-A-17    | CONTROL | P-22      | FU     | P-46      | FU     |
|             |      | P-B-43    | ADMISSION     | P-C-15    | all     | P-4       | ADMISSION     |           |         | P-23      | FU     | P-47      | FU     |
|             | R5   | S-42      | ADMISSION     | P-C-16    | all     | P-5       | ADMISSION     |           |         | P-24      | FU     | P-48      | FU     |
|             |      | B-B-91    | CONTROL       | P-C-17    | CONTROL | P-6       | ADMISSION     | P-1       | FU      | P-25      | FU     | P-49      | FU     |
|             |      | P-B-257   | FU+E          | P-C-18    | CONTROL | P-7       | ADMISSION     | P-2       | FU      | P-26      | FU     | P-50      | FU     |
|             |      | S-43      | ADMISSION     | P-C-19    | CONTROL | P-8       | ADMISSION     | P-3       | FU      | P-27      | FU     | P-51      | FU     |
|             | R6   | S-45      | ADMISSION     | P-C-20    | CONTROL | P-1       | CONTROL       | P-4       | FU      | P-28      | FU     | P-52      | FU     |
|             |      | P-B-258   | FU+E          | P-C-21    | CONTROL | P-2       | CONTROL       | P-5       | FU      | P-29      | FU     | P-53      | FU     |
|             |      |           |               | P-C-22    | CONTROL | P-3       | CONTROL       | P-6       | FU      | P-30      | FU     | P-54      | FU     |
|             |      |           |               | P-C-23    | CONTROL |           |               | P-7       | FU      | P-31      | FU     | P-55      | FU     |
|             | R7   |           |               | P-C-24    | CONTROL |           |               | P-8       | FU      | P-32      | FU     | P-56      | FU     |
| P-57        |      | FU        | P-A-77        | FU        | P-A-K   | FU+E      | B-5           | FU        | B-25    | FU        | B-45   | FU        |        |
| P-58        |      | FU        | P-A-78        | FU        | P-A-L   | FU+E      | B-6           | FU        | B-26    | FU        | B-46   | FU        |        |
| P-59        |      | FU        | P-A-79        | FU        | P-A-M   | FU+E      | B-7           | FU        | B-27    | FU        | B-47   | FU        |        |
| P-60        |      | FU        | P-A-80        | FU        | P-A-N   | FU+E      | B-8           | FU        | B-28    | FU        | B-48   | FU        |        |
| P-61        |      | FU        | P-A-81        | FU        | P-A-O   | FU+E      | B-9           | FU        | B-29    | FU        | B-49   | FU        |        |
| P/P-A-62    |      | FU        | P-A-82        | FU        | P-A-P   | FU+E      | B-10          | FU        | B-30    | FU        | B-50   | FU        |        |
| P-A-63      |      | FU        | P-A-83        | FU        | P-A-Q   | FU+E      | B-11          | FU        | B-31    | FU        | B-51   | FU        |        |
| P-A-64      | FU   | P-A-84    | FU            |           |         | B-12      | FU            | B-32      | FU      | B-52      | FU     |           |        |

Figure 1

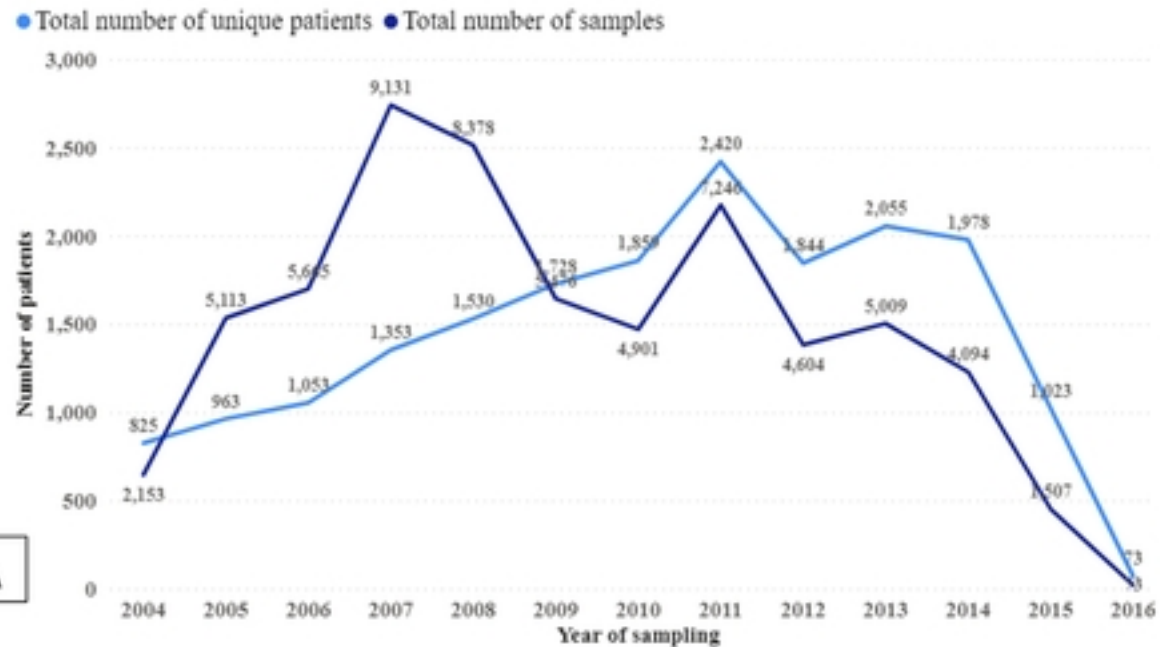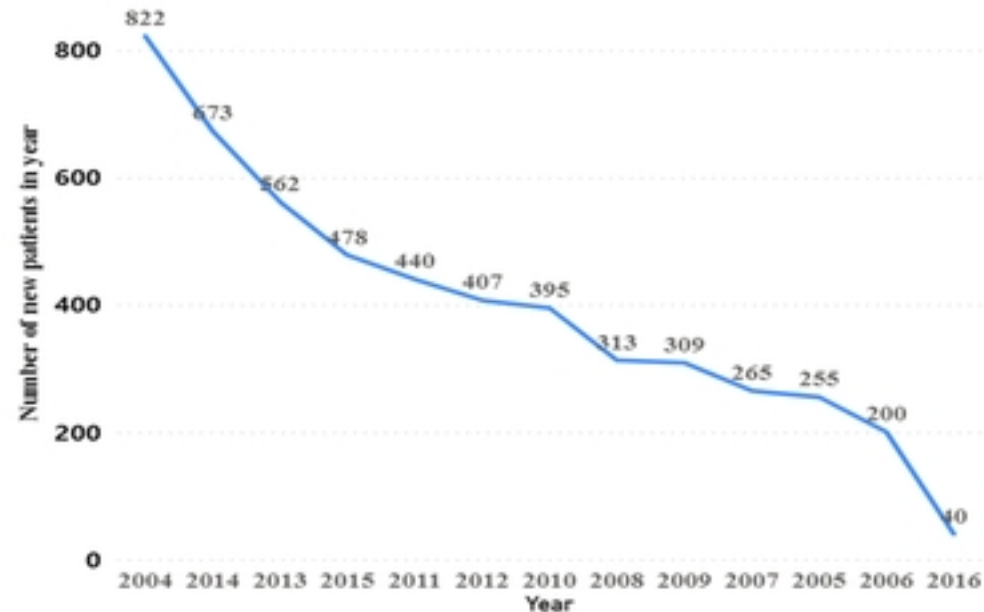

Figure 2

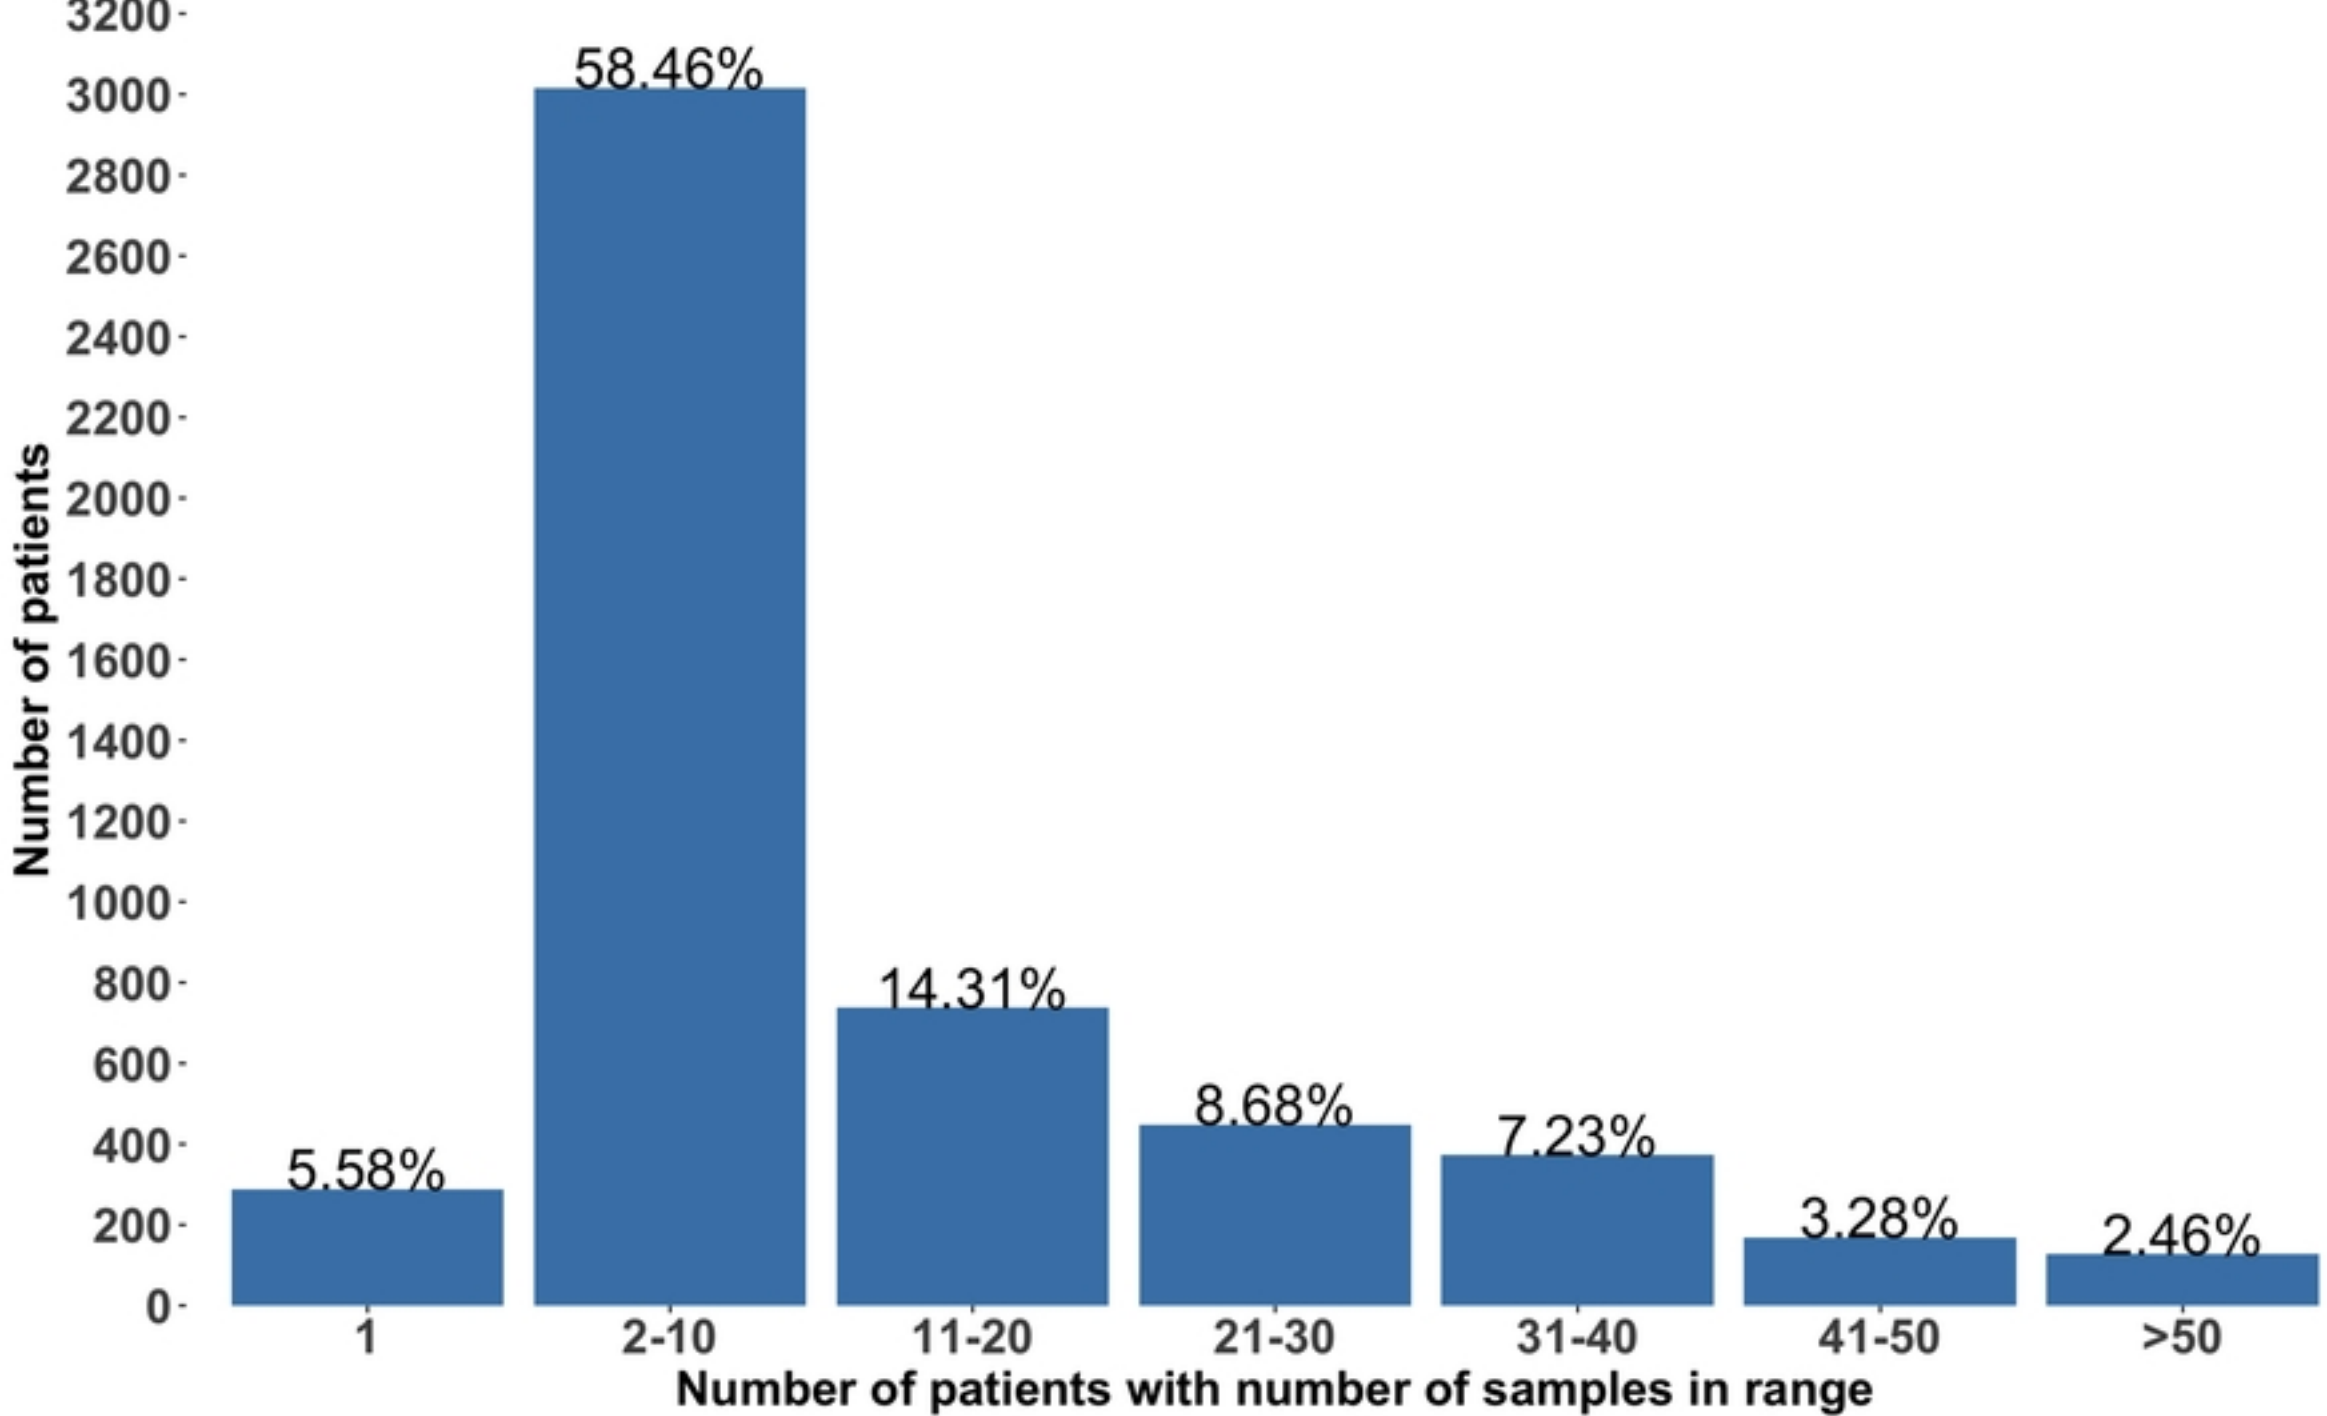

Figure 3
